# Supplementary material for: Determination of Very Low Level of Free Formaldehyde in Liquid Detergents and Cosmetic Products Using Photoluminescence Method
Source: Hindawi journal article supplement (doi:10.1155/2016/1720530), 2016-01-01
Supplement: f1 [file 1720530.f1.pdf]

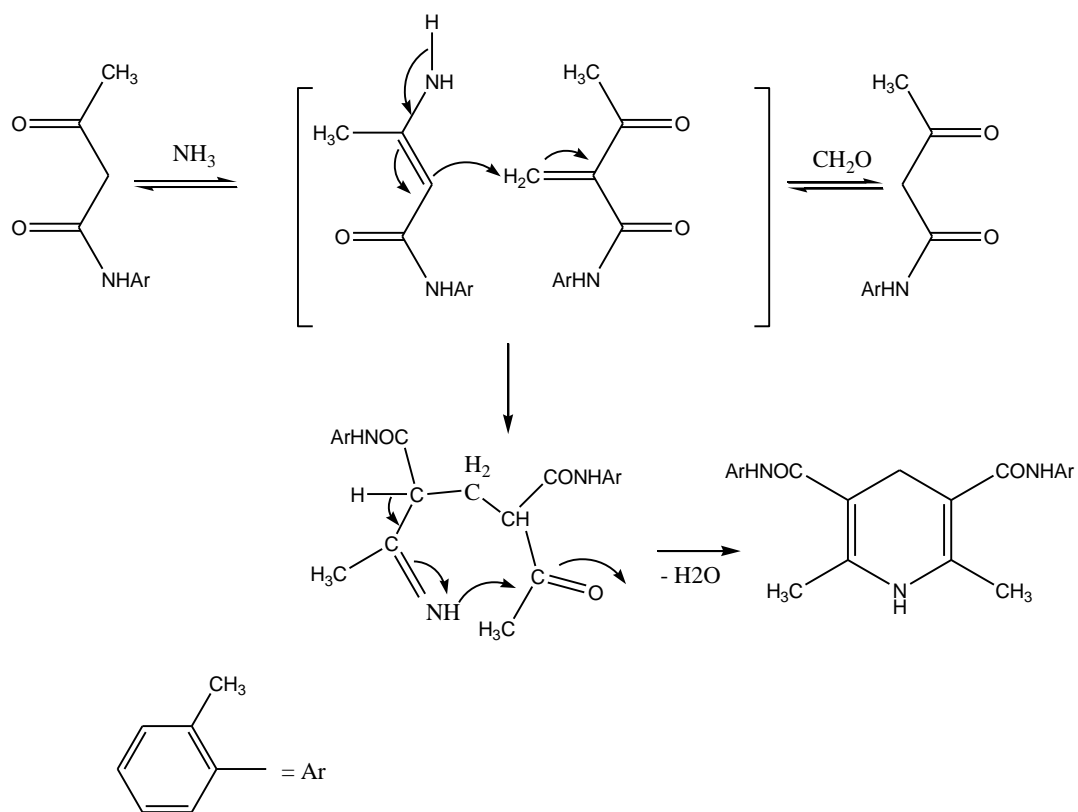

Scheme S1: Mechanism of hantzsch reaction of formaldehyde and 2-methyl acetoacetanilid

## Figure captions

FIGURE S1: Response surface of the combined effect of reaction time, ethanol, acetate ammonium, 2-methylacetoacetanilid and temperature on derivitazation reaction of formaldehyde.

FIGURE S2: Counter plot of the combined effect of reaction time, ethanol, acetate ammonium, 2-methylacetoacetanilid and temperature on derivitazation reaction of formaldehyde.

FIGURE S3:  $^1\text{H}$  NMR product of formaldehyde with 2-methyl acetoacetanilid.

FIGURE S4: Multiplicity  $^1\text{H}$  NMR from 1.5-5.5 ppm product of formaldehyde with 2-methyl acetoacetanilid.

FIGURE S5: Multiplicity  $^1\text{H}$  NMR from 6.7-8.4 ppm product of formaldehyde with 2-methyl acetoacetanilid

FIGURE S6: Effect of temperature on fluorescence intensity for derivitazation reaction of  $1 \times 10^{-6}$  M formaldehyde with 2-methylacetoacetanilid

FIGURE S7: Effect of PH on fluorescence intensity for derivitazation reaction of  $1 \times 10^{-6}$  M formaldehyde with 2-methylacetoacetanilid

FIGURE S8: Three dimension flourescence spectrum of a shampoo sample after derivitaztation of formaldehyde

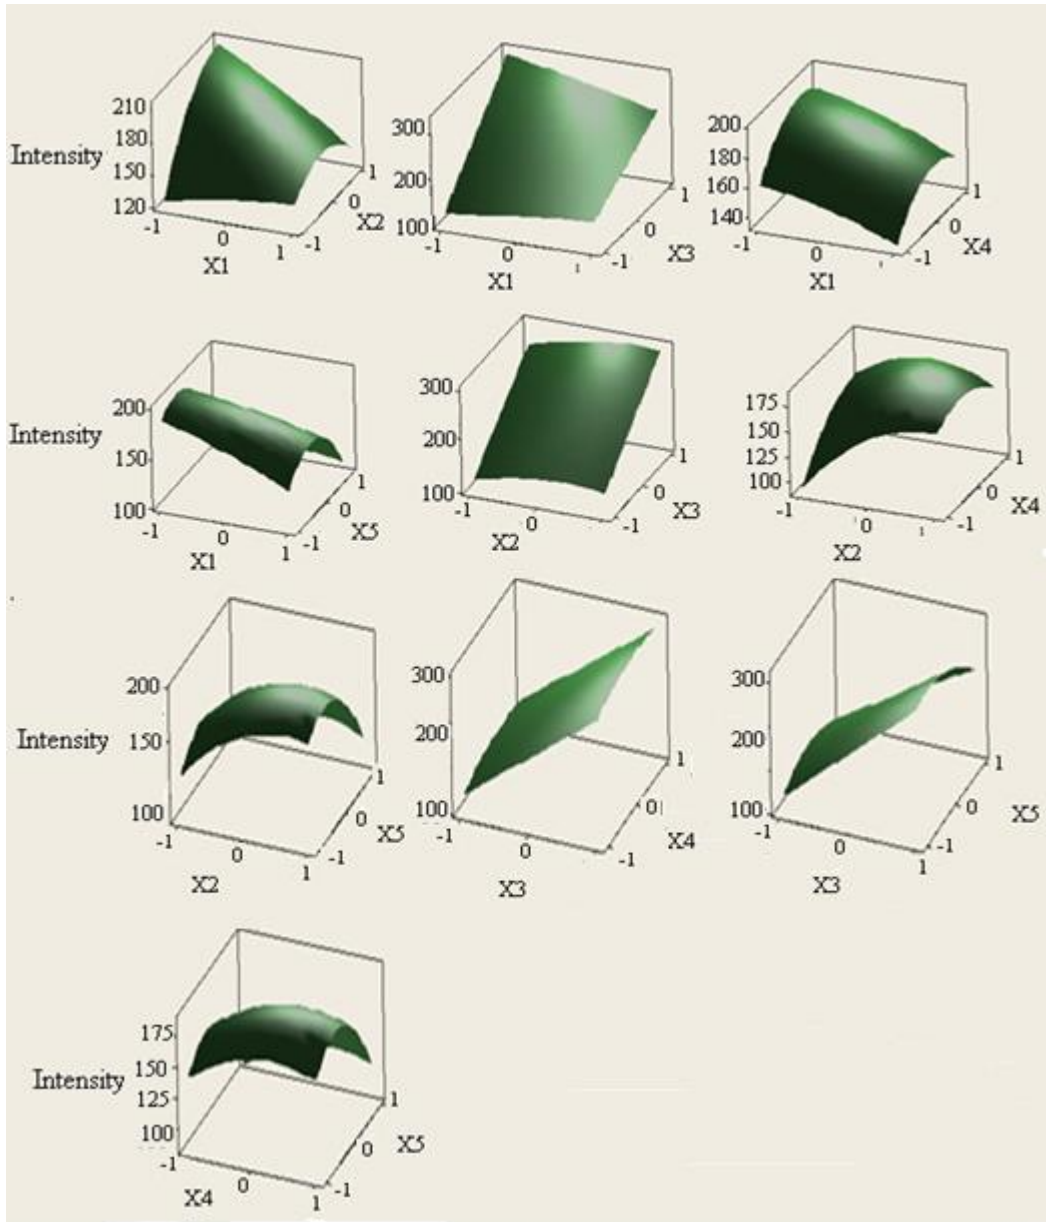

FIGURE S1

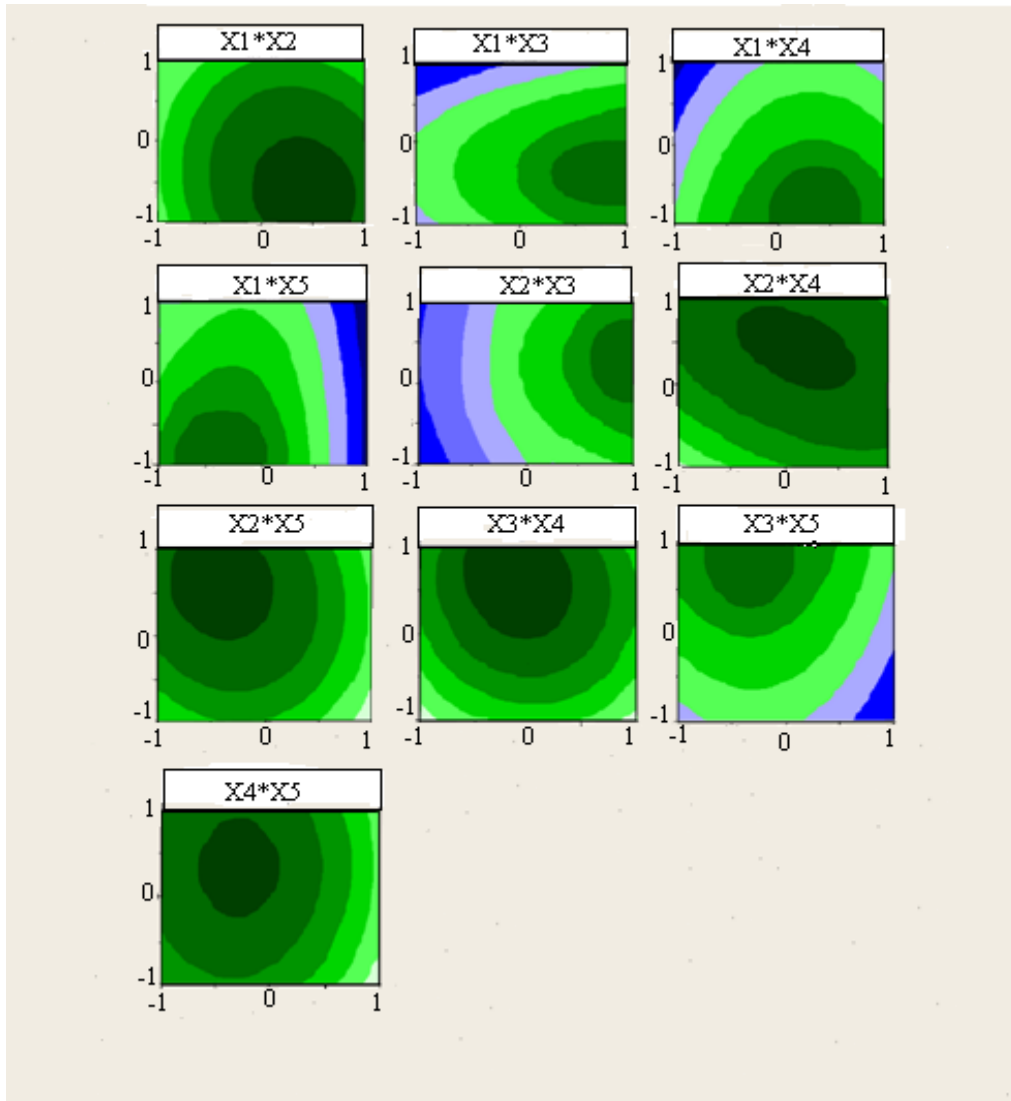

FIGURE S2

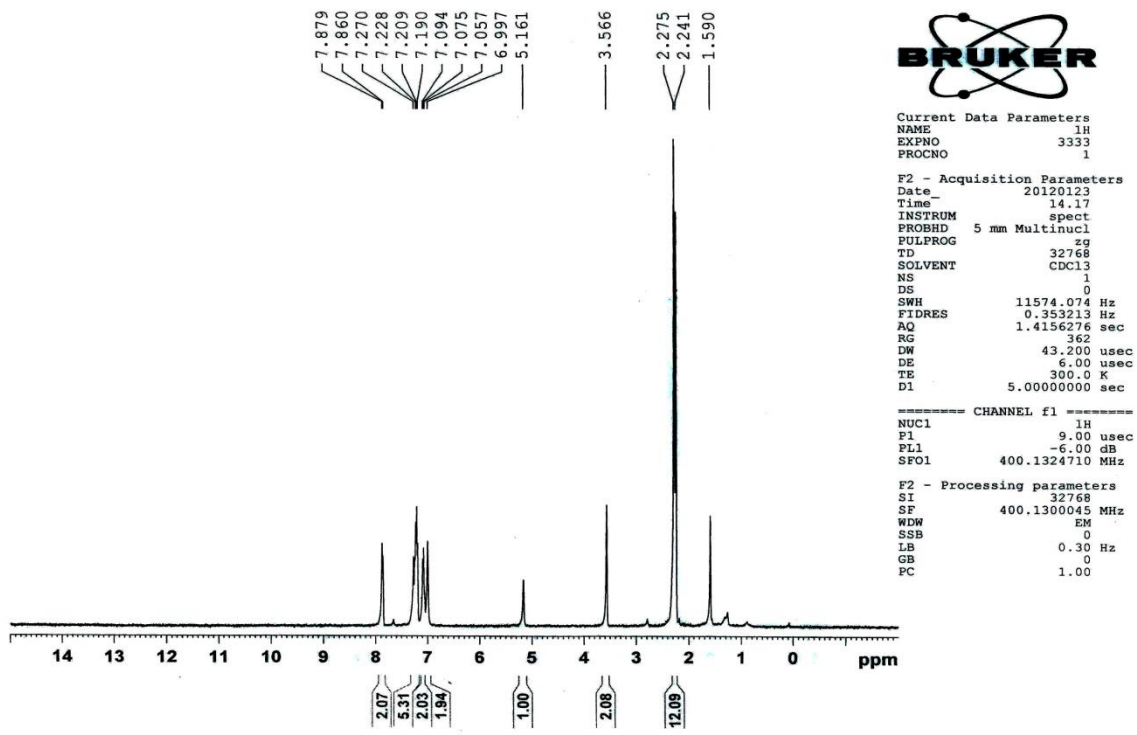

FIGURE S3

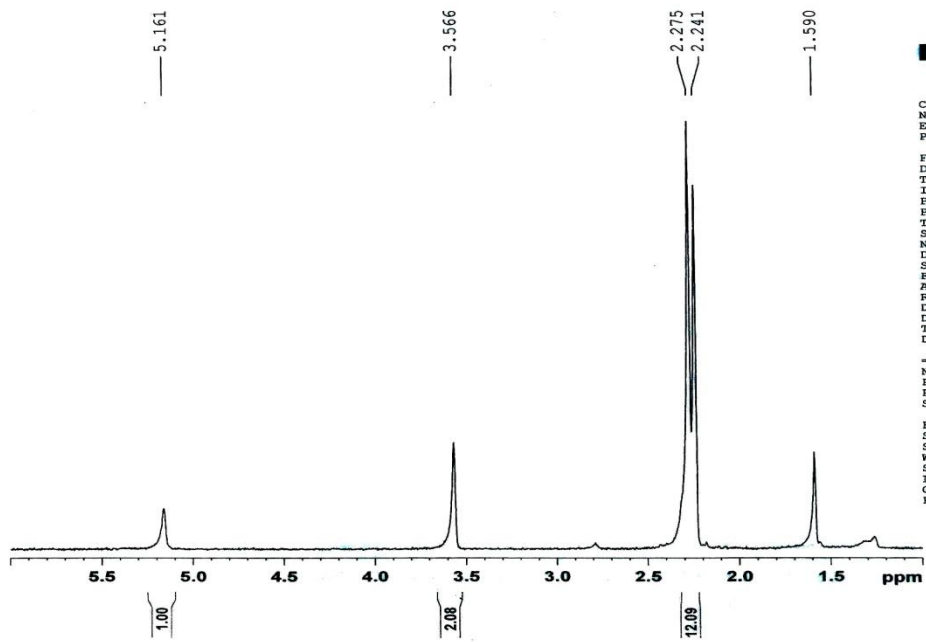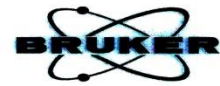

```

Current Data Parameters
NAME      1H
EXPNO     3333
PROCNO    1

F2 - Acquisition Parameters
Date_     20120123
Time      14.17
INSTRUM   spect
PROBHD    5 mm Multinucl
PULPROG   zg
TD         32768
SOLVENT   CDCl3
NS         1
DS         0
SWH        11574.074 Hz
FIDRES     0.353213 Hz
AQ         1.4156276 sec
RG         362
DW         43.200 usec
DE         6.00 usec
TE         300.0 K
D1         5.0000000 sec

----- CHANNEL f1 -----
NUC1      1H
P1         9.00 usec
PL1       -6.00 dB
SFO1      400.1324710 MHz

F2 - Processing parameters
SI         32768
SF         400.1300045 MHz
WDW        EM
SSB        0
LB         0.30 Hz
GB         0
PC         1.00

```

FIGURE S4

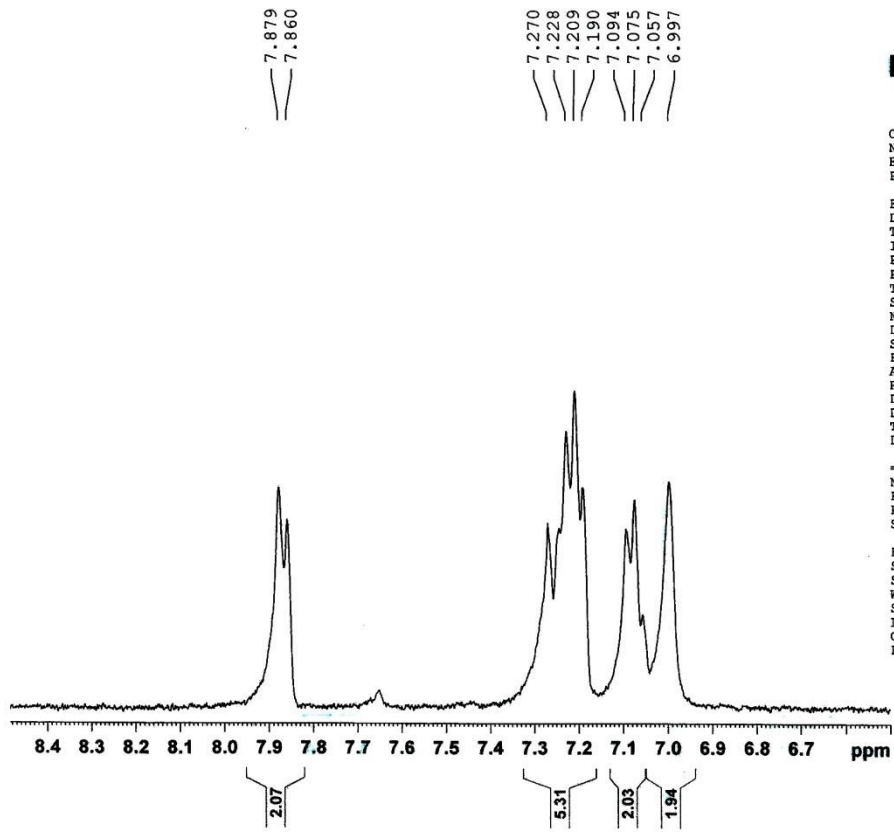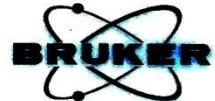

```

Current Data Parameters
NAME          1H
EXPNO         3333
PROCNO        1

F2 - Acquisition Parameters
Date_         20120123
Time_         14.17
INSTRUM       spect
PROBHD        5 mm Multinucl
PULPROG       zg
TD            32768
SOLVENT       CDC13
NS            1
DS            0
SWH           11574.074 Hz
FIDRES        0.353213 Hz
AQ            1.4156276 sec
RG            362
DW            43.200 usec
DE            6.00 usec
TE            300.0 K
D1            5.00000000 sec

===== CHANNEL f1 =====
NUC1          1H
P1            9.00 usec
PL1          -6.00 dB
SFO1         400.1324710 MHz

F2 - Processing parameters
SI            32768
SF           400.1300045 MHz
WDW          EM
SSB          0
LB           0.30 Hz
GB           0
PC           1.00
  
```

FIGURE S5

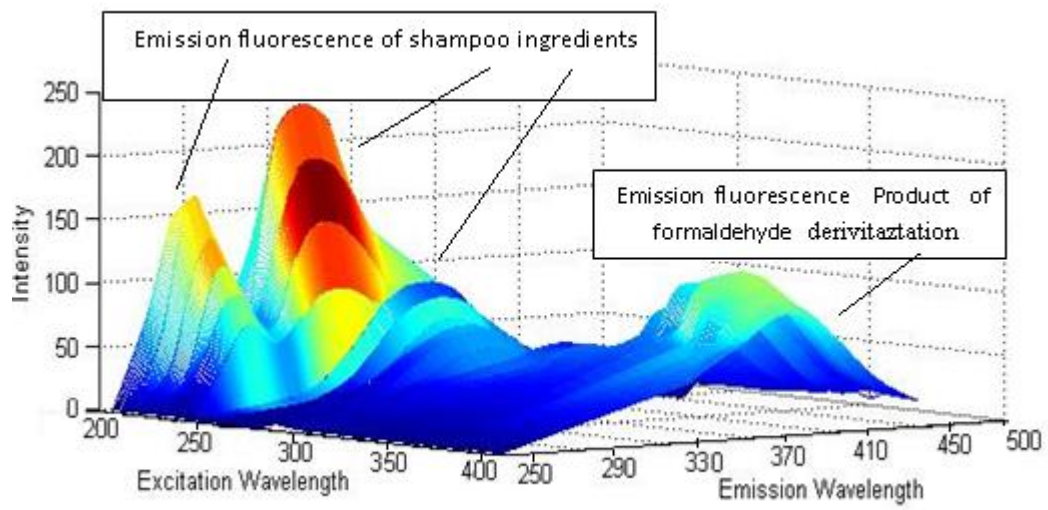

FIGURE S6



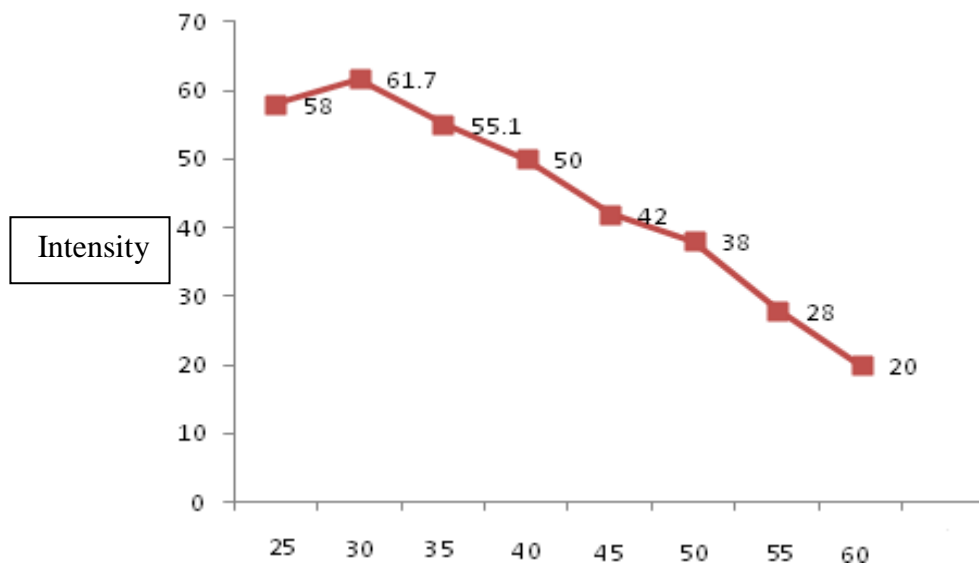

FIGURE S7

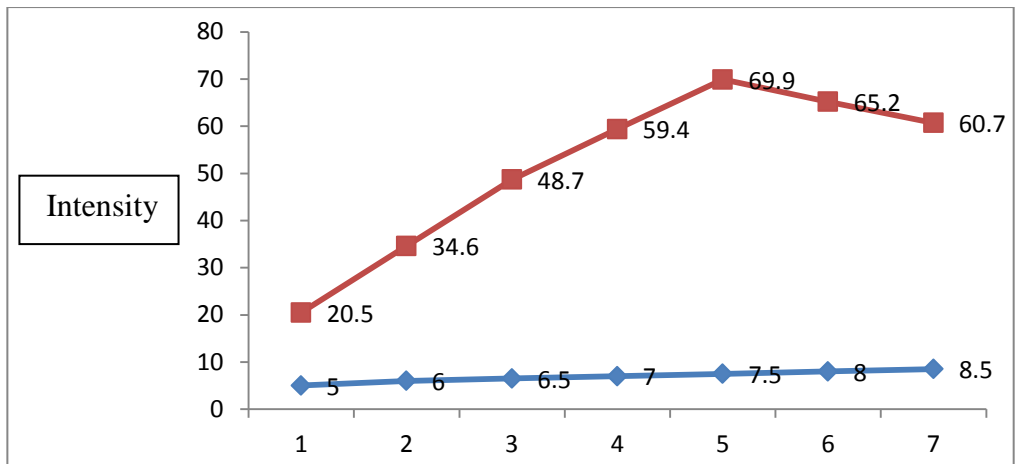

FIGURE S8

TABLE captions

TABLE S1: Scheme of independent variables ( $X_i$ ) for Box- Behnken design

TABLE S2: Estimated regression coefficients for derivitazation reaction of formaldehyde

TABLE S1: Scheme of independent variables ( $X_i$ ) for Box- Behnken design

| Std Order | Run Order | $X_1$ | $X_2$ | $X_3$ | $X_4$ | $X_5$ |
|-----------|-----------|-------|-------|-------|-------|-------|
| 11        | 1         | 1     | 0     | -1    | 0     | 1     |
| 30        | 2         | 0     | 0     | 1     | 0     | -1    |
| 33        | 3         | -1    | 0     | 0     | 0     | -1    |
| 20        | 4         | 0     | 0     | 0     | 1     | 1     |
| 18        | 5         | 0     | 0     | 0     | 1     | -1    |
| 3         | 6         | -1    | 1     | 0     | 0     | 0     |
| 5         | 7         | 0     | 0     | -1    | -1    | 0     |
| 40        | 8         | 0     | 1     | 0     | 1     | 0     |
| 22        | 9         | 0     | 1     | -1    | 0     | 0     |
| 34        | 10        | 1     | 0     | 0     | 0     | -1    |
| 7         | 11        | 0     | 0     | -1    | 1     | 0     |
| 26        | 12        | 1     | 0     | 0     | -1    | 0     |
| 38        | 13        | 0     | 1     | 0     | -1    | 0     |
| 23        | 14        | 0     | -1    | 1     | 0     | 0     |
| 35        | 15        | -1    | 0     | 0     | 0     | 1     |
| 37        | 16        | 0     | -1    | 0     | -1    | 0     |
| 10        | 17        | 0     | 1     | 0     | 0     | -1    |
| 13        | 18        | -1    | 0     | -1    | 0     | 0     |
| 14        | 19        | 1     | 0     | -1    | 0     | 0     |
| 43        | 20        | 0     | 0     | 0     | 0     | 0     |
| 1         | 21        | -1    | -1    | 0     | 0     | 0     |
| 24        | 22        | 0     | 1     | 1     | 0     | 0     |
| 31        | 23        | 0     | 0     | -1    | 0     | 1     |
| 15        | 24        | -1    | 0     | 1     | 0     | 0     |
| 29        | 25        | 0     | 0     | -1    | 0     | -1    |
| 32        | 26        | 0     | 0     | 1     | 0     | 1     |
| 28        | 27        | 0     | -1    | -1    | 0     | 0     |
| 2         | 29        | 1     | -1    | 0     | 0     | 0     |
| 41        | 30        | 0     | 0     | 0     | 0     | 0     |
| 44        | 31        | 0     | 0     | 0     | 0     | 0     |
| 27        | 32        | -1    | 0     | 0     | 1     | 0     |
| 36        | 33        | 1     | 0     | 0     | 0     | 1     |
| 39        | 34        | 0     | -1    | 0     | 1     | 0     |
| 9         | 35        | 0     | -1    | 0     | 0     | -1    |
| 17        | 36        | 0     | 0     | 0     | -1    | -1    |
| 6         | 37        | 0     | 0     | 1     | -1    | 0     |
| 19        | 38        | 0     | 0     | 0     | -1    | 1     |
| 16        | 39        | 1     | 0     | 1     | 0     | 0     |
| 4         | 40        | 1     | 1     | 0     | 0     | 0     |
| 46        | 41        | 0     | 0     | 0     | 0     | 0     |
| 8         | 42        | 0     | 0     | 1     | 1     | 0     |
| 45        | 43        | 0     | 0     | 0     | 0     | 0     |
| 25        | 44        | -1    | 0     | 0     | -1    | 0     |
| 12        | 45        | 0     | 1     | 0     | 0     | 1     |
| 42        | 46        | 0     | 0     | 0     | 0     | 0     |

TABLE S2: Estimated regression coefficients for derivitazation reaction of formaldehyde

| Term                           | Coef <sup>a</sup> . | SE coef <sup>b</sup> . | t <sup>c</sup> | p-value <sup>d</sup> |
|--------------------------------|---------------------|------------------------|----------------|----------------------|
| Constant                       | 188.890             | 7.263                  | 26.006         | 0.000                |
| x <sub>1</sub>                 | -29.086             | 4.448                  | -6.539         | 0.000                |
| x <sub>2</sub>                 | 19.144              | 4.448                  | 4.304          | 0.000                |
| x <sub>3</sub>                 | 116.579             | 4.448                  | 26.210         | 0.000                |
| x <sub>4</sub>                 | 8.094               | 4.448                  | 1.820          | 0.081                |
| x <sub>5</sub>                 | -11.167             | 4.448                  | -2.511         | 0.019                |
| x <sub>1</sub> *x <sub>1</sub> | -38.974             | 6.023                  | -6.471         | 0.000                |
| x <sub>2</sub> *x <sub>2</sub> | -22.639             | 6.023                  | -3.759         | 0.001                |
| x <sub>3</sub> *x <sub>3</sub> | 2.118               | 6.023                  | 0.352          | 0.728                |
| x <sub>4</sub> *x <sub>4</sub> | -25.145             | 6.023                  | -4.175         | 0.000                |
| x <sub>5</sub> *x <sub>5</sub> | -20.514             | 6.023                  | -3.406         | 0.002                |
| x <sub>1</sub> *x <sub>2</sub> | -21.202             | 8.896                  | -2.383         | 0.025                |
| x <sub>1</sub> *x <sub>3</sub> | -22.313             | 8.896                  | -2.508         | 0.019                |
| x <sub>1</sub> *x <sub>4</sub> | 0.777               | 8.896                  | 0.087          | 0.931                |
| x <sub>1</sub> *x <sub>5</sub> | 10.498              | 8.896                  | 1.180          | 0.249                |
| x <sub>2</sub> *x <sub>3</sub> | 7.751               | 8.896                  | 0.871          | 0.392                |
| x <sub>2</sub> *x <sub>4</sub> | -39.969             | 8.896                  | -4.493         | 0.000                |
| x <sub>2</sub> *x <sub>5</sub> | -20.762             | 8.896                  | -2.334         | 0.028                |
| x <sub>3</sub> *x <sub>4</sub> | -1.809              | 8.896                  | -0.203         | 0.841                |
| x <sub>3</sub> *x <sub>5</sub> | -13.945             | 8.896                  | -1.568         | 0.130                |
| x <sub>4</sub> *x <sub>5</sub> | 8.557               | 8.896                  | 0.962          | 0.345                |
| Adj-R square                   | 97.19%              |                        |                |                      |
| Pred-R square                  | 89.35%              |                        |                |                      |
| R square                       | 94.94%              |                        |                |                      |

a= coefficient, b=standard error of the coefficient, c=t test, d=p value
